# Supplementary material for: Mechanical and Optical Properties of Polylactic Acid Films Containing Surfactant-Modified Cellulose Nanocrystals
Source: Hindawi journal article supplement (doi:10.1155/2018/7124260), 2018-10-02
Supplement: f1 [file 7124260.f1.docx]

Mechanical and Optical Properties of Polylactic Acid Films Containing with Surfactant-Modified Cellulose Nanocrystals

Jose Luis Orellana, Derek Wichhart and Christopher L. Kitchens*

**SUPPORTING INFORMATION**


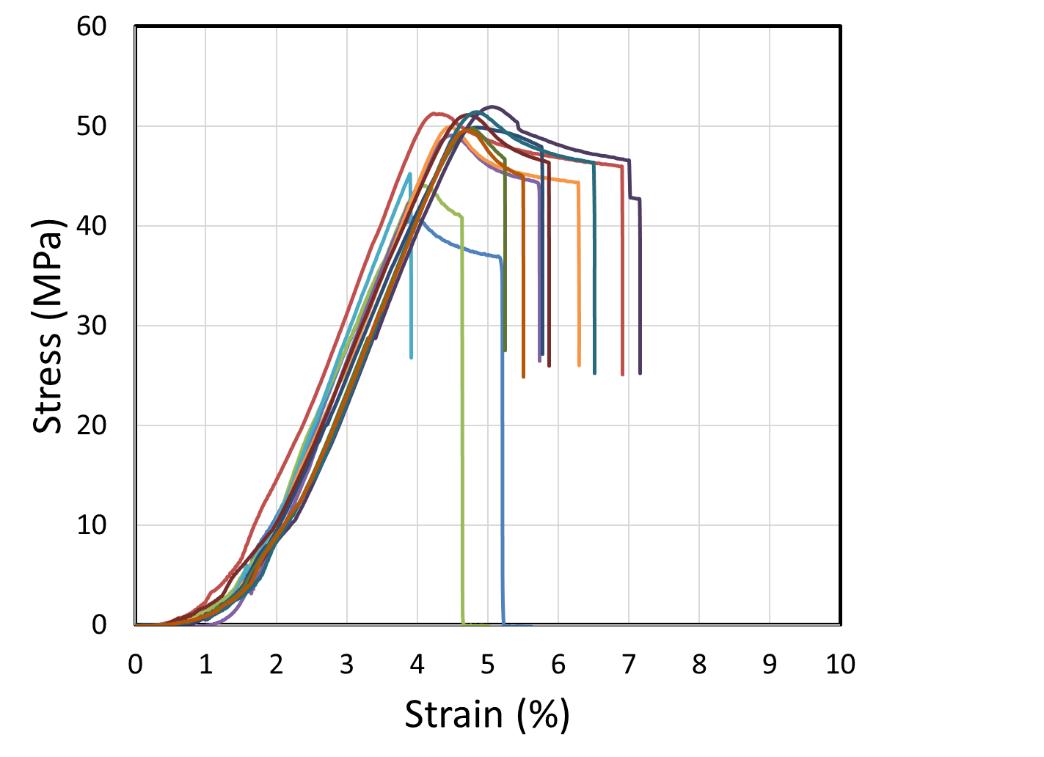


b) PLA w/ 1 wt% CNC – No Surfactant


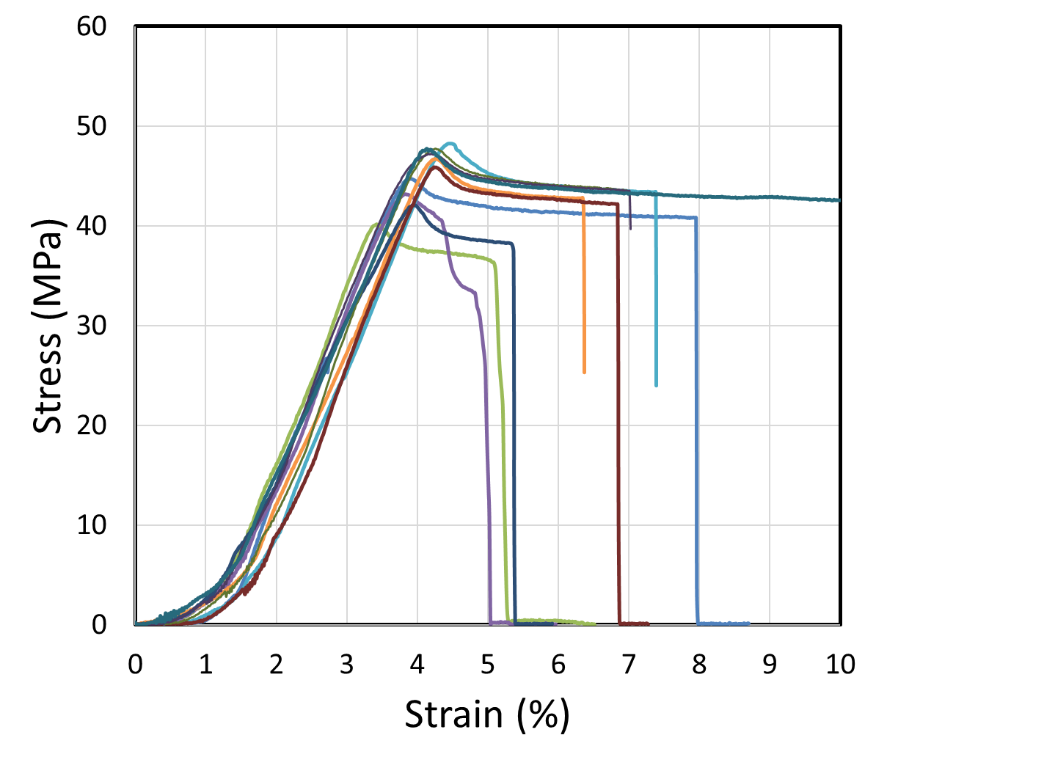


a) Pure PLA


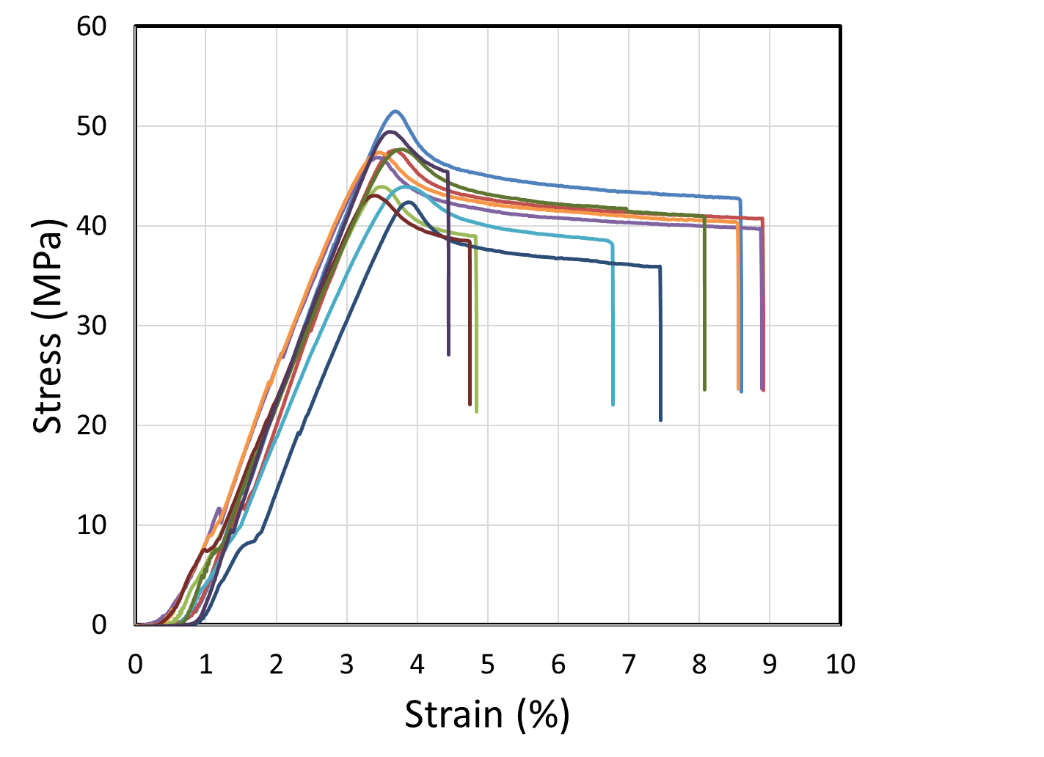


c) PLA w/ 1 wt% CNC – DA Surfactant


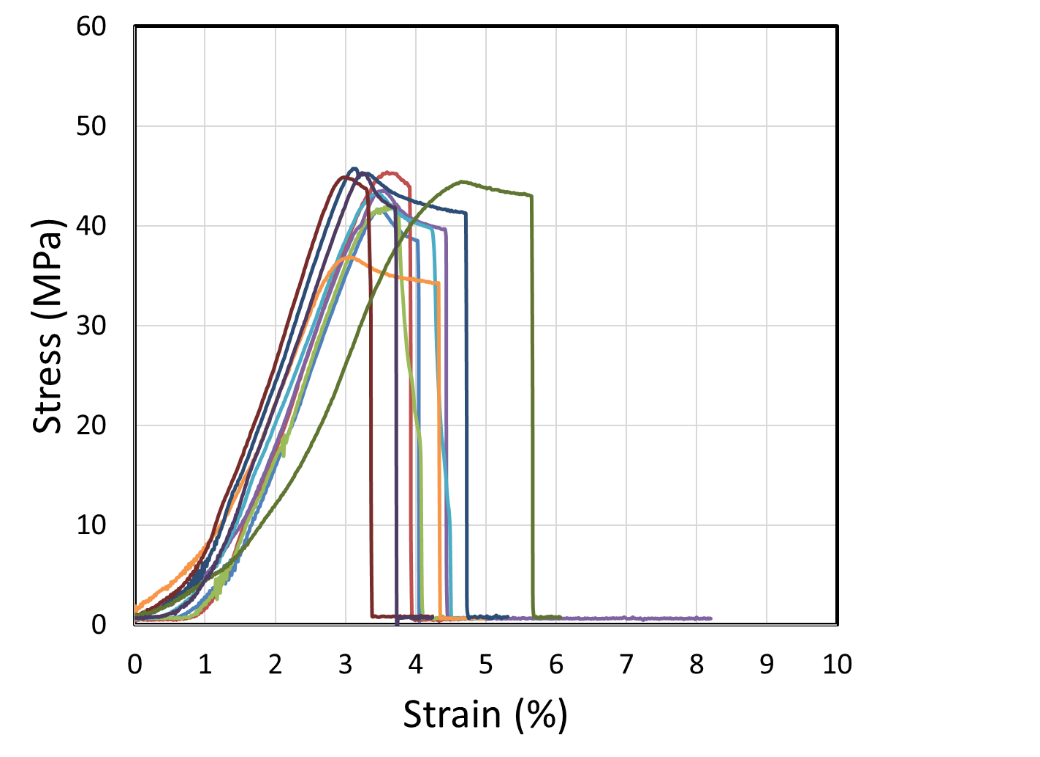


d) PLA w/ 1 wt% CNC – CTAB Surfactant

**Figure S1**. Representative stress – strain curves for 10 samples of a) pure PLA, b) PLA with 1 wt. % CNC without added surfactant, c) PLA with 1.0 wt. % CNC and decylamine surfactant, and d) PLA with 1.0 wt. % CNC and CTAB surfactant. Values for the tensile strength, tensile modulus, and toughness (energy at break) were determined for each curve and averaged to yield values in Figure 3.


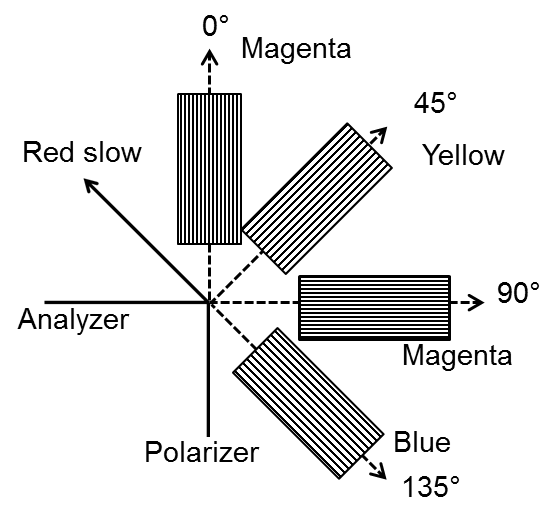


**Figure S2.** Orientation of the polarizer, analyzer and the first order red filter (red slow direction); and colors observed when liquid crystals are oriented in the corresponding angles of rotation.


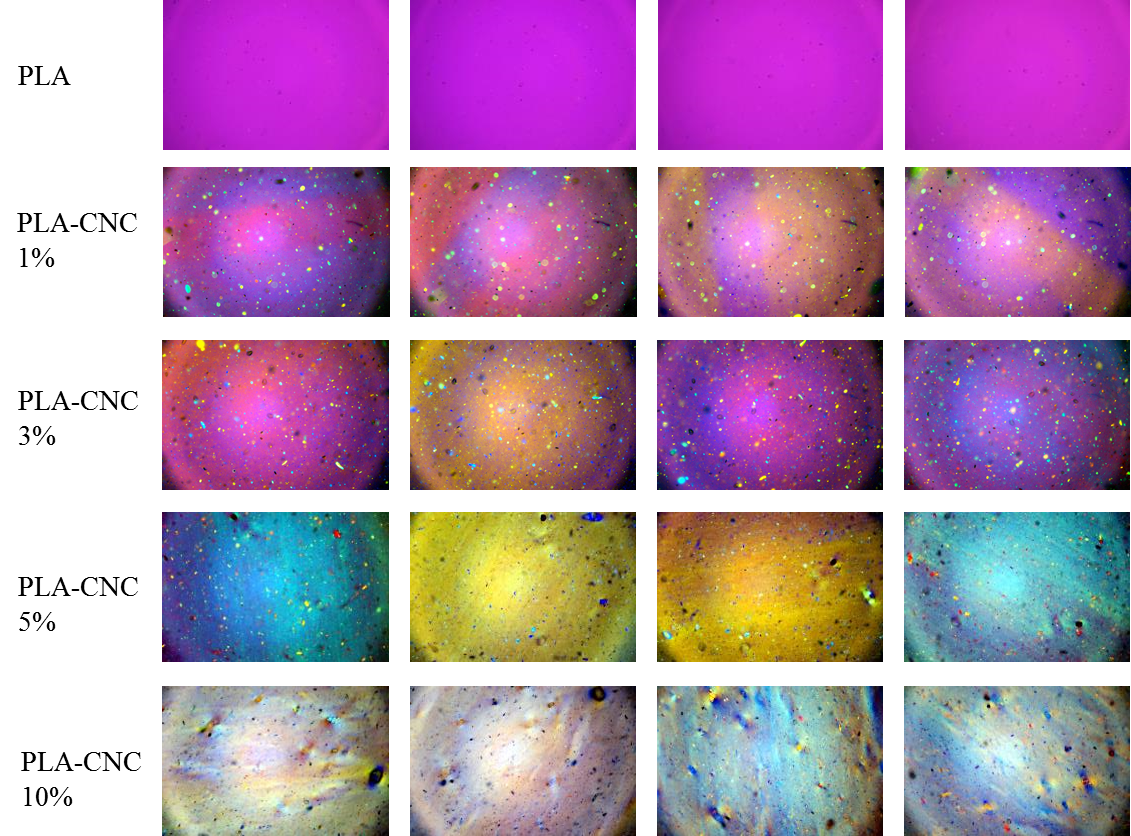


**Figure S3.** Polarized microscopy of PLA-CNC-UM films at different CNC loadings using a first order red plate (5% and 10% lack of meaning when analyzed with the red plate due to the high retardations)

**
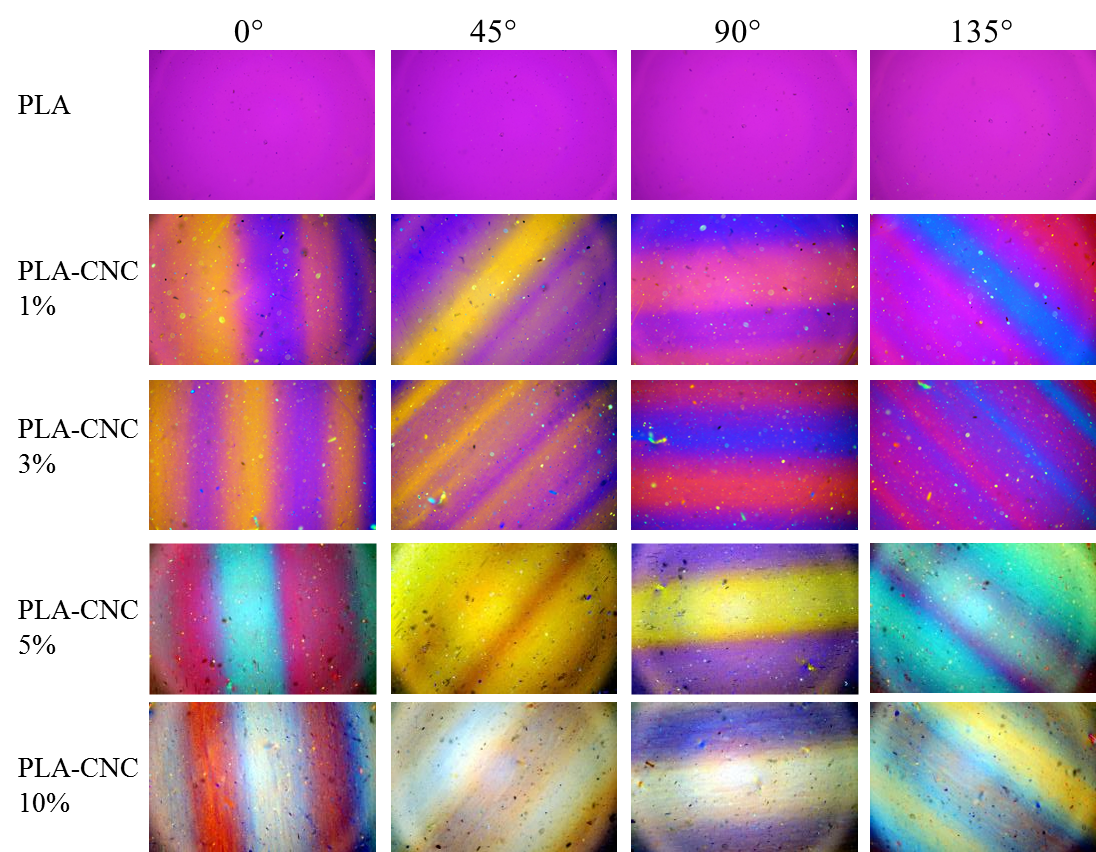
**

**Figure S4**. Polarized microscopy of PLA-CNC-DA films at different CNC loadings using a first order red plate (5% and 10% lack of meaning when analyzed with the red plate due to the high retardations)


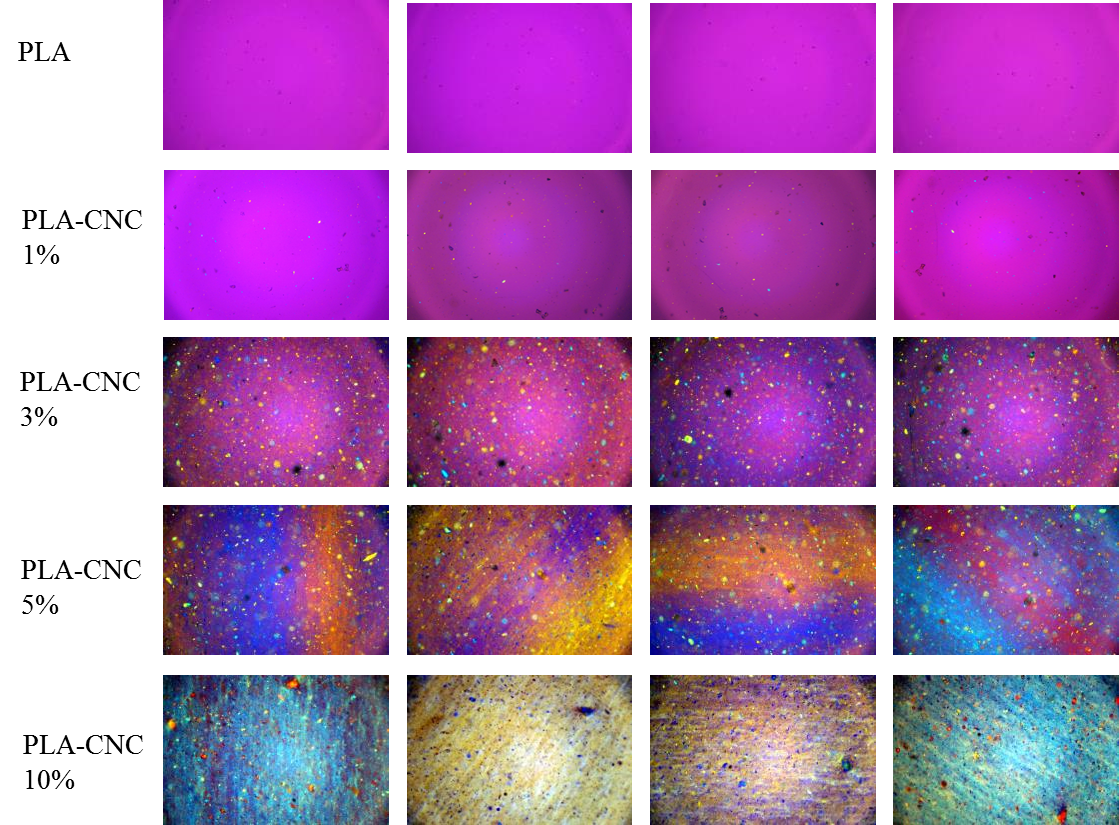


**Figure S5.** Polarized microscopy of PLA-CNC-CTAB films at different CNC loadings using a first order red plate (5% and 10% lack of meaning when analyzed with the red plate due to the high retardations)


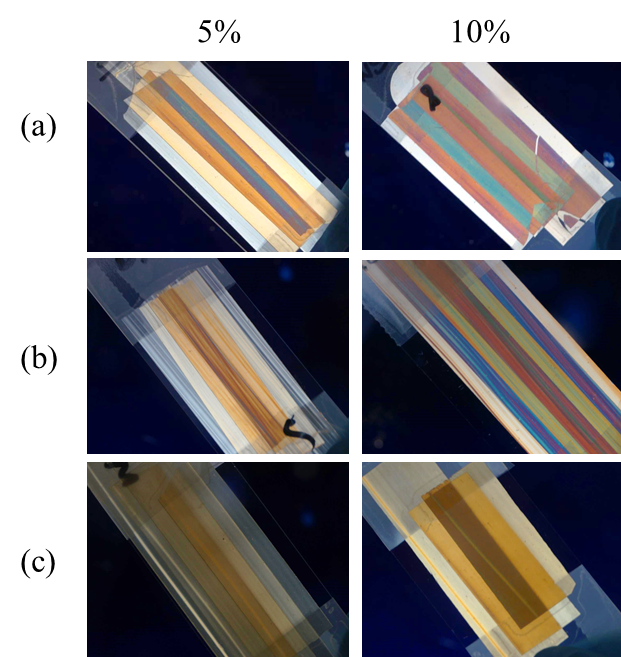


**Figure S6.** PLA-CNC (5% and 10%) composite films with (a) unmodified CNCs; (b) DA-modified CNCs; and (c) CTAB-modified CNCs.


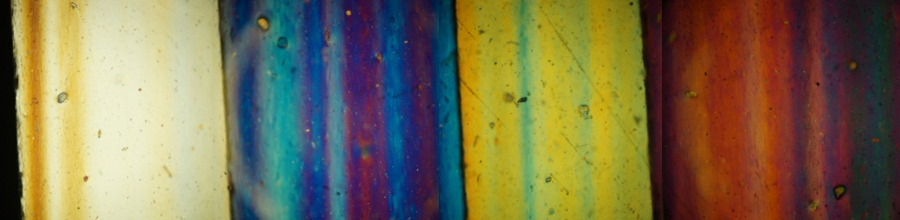


**Figure S7.** Low magnification polarized-light microscopy of PLA-CNC(10%)-DA nanocomposites showing colored optical properties
